# Supplementary material for: Land cover and vegetation data from an ecological survey of `keyhabitat' landscapes in England, 1992–93
Source: Copernicus journal article supplement (doi:10.5194/essd-2017-131), 2017-12-08
Supplement: Supplementary file [file essd-2017-131-AC1-supplement.pdf]

## Ecological survey of 'Key Habitats' in England, 1992-93

### Dataset Documentation

|                                              |                                                                                                                                                                                                                                                                                                                                                                                                                                                                                                                                                                                                                                                                                                                                                                                                                                                                                   |
|----------------------------------------------|-----------------------------------------------------------------------------------------------------------------------------------------------------------------------------------------------------------------------------------------------------------------------------------------------------------------------------------------------------------------------------------------------------------------------------------------------------------------------------------------------------------------------------------------------------------------------------------------------------------------------------------------------------------------------------------------------------------------------------------------------------------------------------------------------------------------------------------------------------------------------------------|
| <b>Dataset Name:</b>                         | <i>Habitat and vegetation data from an ecological survey of terrestrial key habitats in England, 1992-1993</i>                                                                                                                                                                                                                                                                                                                                                                                                                                                                                                                                                                                                                                                                                                                                                                    |
| <b>Dataset Background &amp; Description:</b> | Since 1978, a series of national surveys (Countryside Surveys) have been carried out by the Institute of Terrestrial Ecology/Centre for Ecology and Hydrology to gather data on the natural environment. The sampling framework for these surveys is not optimised to yield data on rarer or more specialised habitats. This Key Habitat survey was commissioned in the early 1990s to carry out additional survey work into habitats which were perceived to be under threat or which represented areas of concern to the Department for the Environment. The habitats were: Lowland heath, Chalk and limestone grasslands, Coasts, Uplands. For reporting purposes, the survey was supplemented by additional data, particularly for river valleys and waterside landscapes (lowlands), from Countryside Survey 1990.                                                           |
| <b>Geographic Coverage:</b>                  | England                                                                                                                                                                                                                                                                                                                                                                                                                                                                                                                                                                                                                                                                                                                                                                                                                                                                           |
| <b>Time Period:</b>                          | 1992-93                                                                                                                                                                                                                                                                                                                                                                                                                                                                                                                                                                                                                                                                                                                                                                                                                                                                           |
| <b>Data Categories:</b>                      | Vegetation Data: Vascular plants. Bryophytes. Lichens.<br>Boundary data: Boundary descriptions at grid points across each 1km survey square<br>Habitat Data: Land cover data at grid points across each 1km survey square                                                                                                                                                                                                                                                                                                                                                                                                                                                                                                                                                                                                                                                         |
| <b>Survey Design &amp; Methods:</b>          | Stratified sampling across entire area. Bunce & Shaw's 1973 standardized survey methods with modifications – refer to field handbooks.                                                                                                                                                                                                                                                                                                                                                                                                                                                                                                                                                                                                                                                                                                                                            |
| <b>Related Datasets:</b>                     | Countryside Survey <a href="http://www.countrysidesurvey.org.uk/">http://www.countrysidesurvey.org.uk/</a>                                                                                                                                                                                                                                                                                                                                                                                                                                                                                                                                                                                                                                                                                                                                                                        |
| <b>Key documents &amp; publications:</b>     | <ul style="list-style-type: none"> <li>• Barr, C.J. (1993) <i>Changes in Key Habitat: Surveys of Chalk &amp; Limestone Grassland, Coastal, and Upland Landscapes, Field Handbook. Draft 3</i>. Grange-over-Sands, NERC/Institute of Terrestrial Ecology.</li> <li>• Barr, C.J. (1992) <i>Changes in Key Habitat: A Survey of Lowland Heath, Field Survey Handbook</i>. ITE Merlewood.</li> <li>• Barr, C.J. (1997) <i>Current Status and Prospects for Key Habitats in England, Part 6 Summary Report</i>. Institute of Terrestrial Ecology, University of Sheffield - Unit of Comparative Plant Ecology, Environmental Resource Management Ltd, Department of the Environment, Transport and the Regions.</li> <li>• Bunce R.G.H &amp; Shaw M.W. (1973). A Standardized Procedure for Ecological Survey. <i>Journal of Environmental Management</i>, Vol. 1, 239-258.</li> </ul> |
| <b>Originator Details:</b>                   | <i>Survey &amp; Project Management:</i> Barr C.J., Bunce, R.G.H., Cummins, R.P., Hallam, C.J. Hornung, M.: Institute of Terrestrial Ecology, Merlewood, Grange over Sands, Cumbria.<br><i>Data management:</i> Wood, C.M.: Centre for Ecology & Hydrology, Lancaster.                                                                                                                                                                                                                                                                                                                                                                                                                                                                                                                                                                                                             |
| <b>Field surveyors:</b>                      | <i>H. Adams, T. Barden, E. Biron, R. Cummins, J. Davis, J. Day, D. De La Pole, C. Hallam, M. Harrison, R. Hewison, J. Hobbs, C. Kanefsky, G. Levine, M. Marler, D. McCutcheon, L. McDonnell, M. Ness, K. Pollock, S. Walters, M. Webb</i>                                                                                                                                                                                                                                                                                                                                                                                                                                                                                                                                                                                                                                         |
| <b>Quality control:</b>                      | <i>All data were collected by trained surveyors. Collected data have been checked and verified as far as possible.</i>                                                                                                                                                                                                                                                                                                                                                                                                                                                                                                                                                                                                                                                                                                                                                            |

## Geographical Coverage

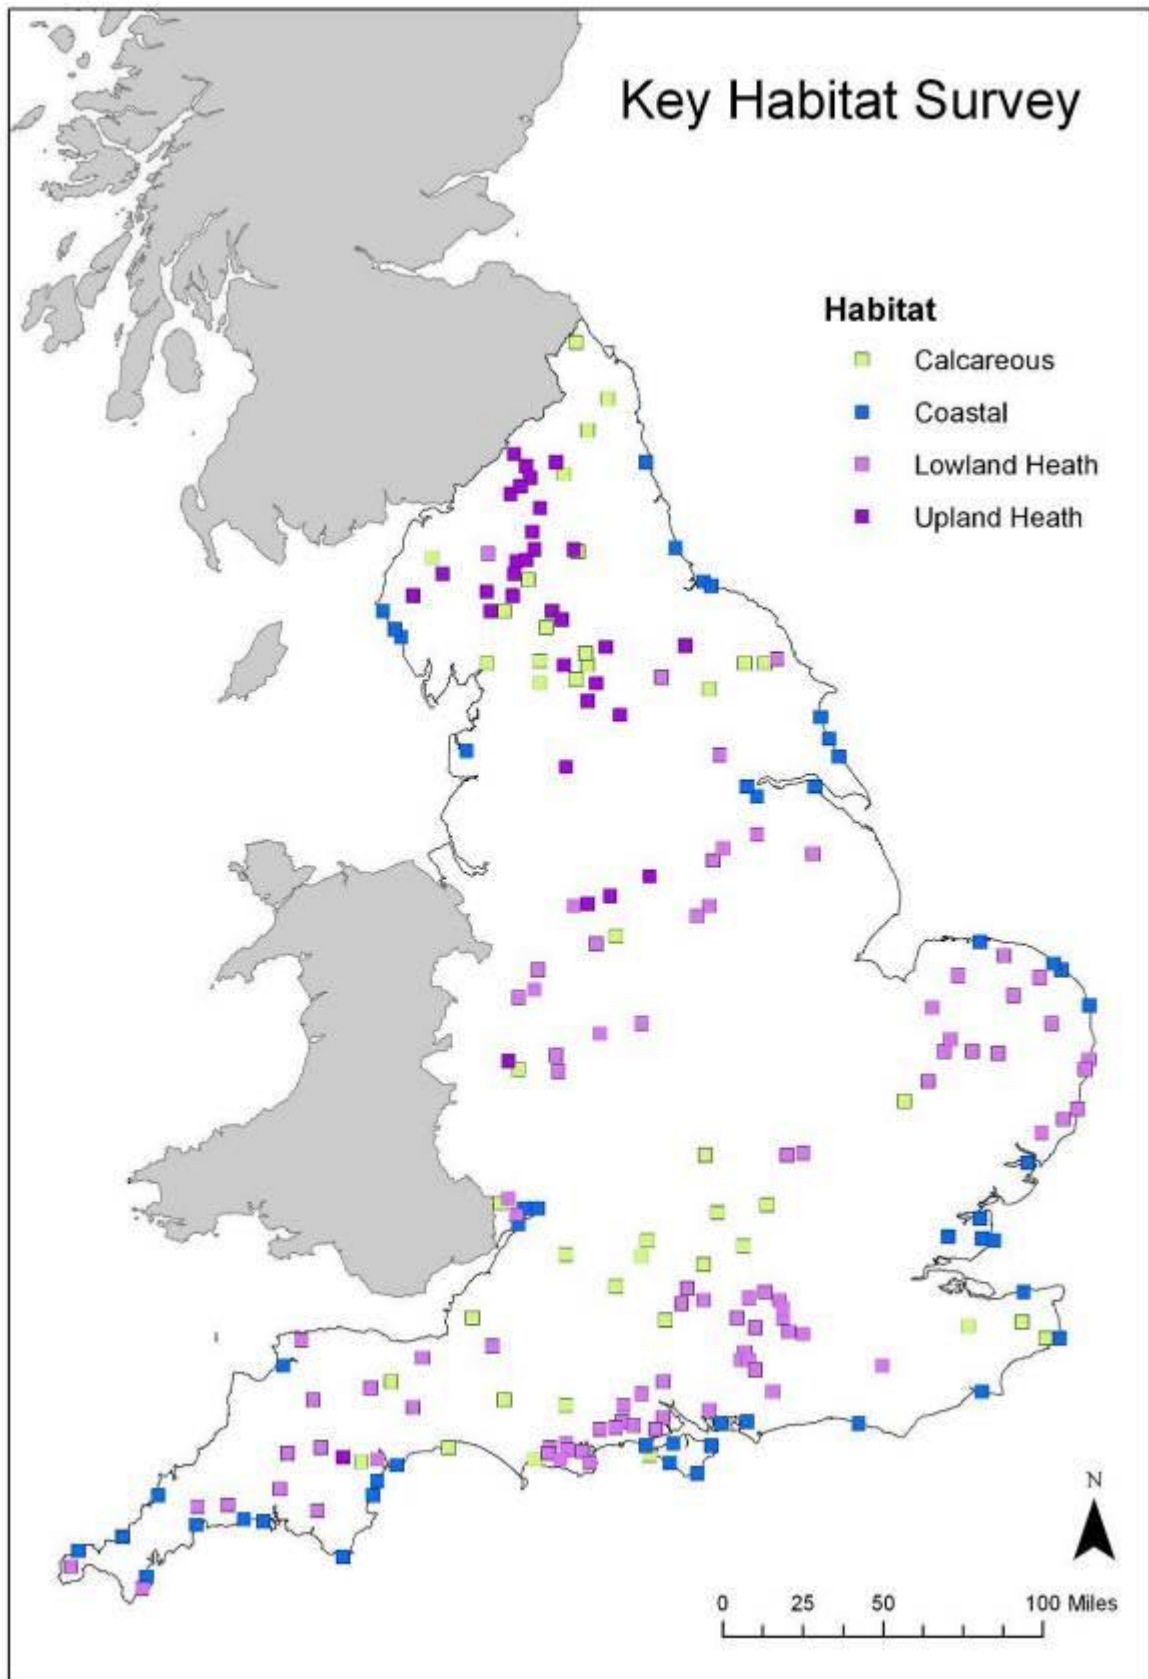

## Key Habitat Survey of England 1992-93 - Habitat Data & Boundary Data

---

At each point on a regular grid (16 or 25 depending on landscape/habitat type), within 1 km survey squares, codes describing land cover and the nearest boundary were recorded. Refer to field handbooks for more detail (Barr, 1992; Barr, 1993).

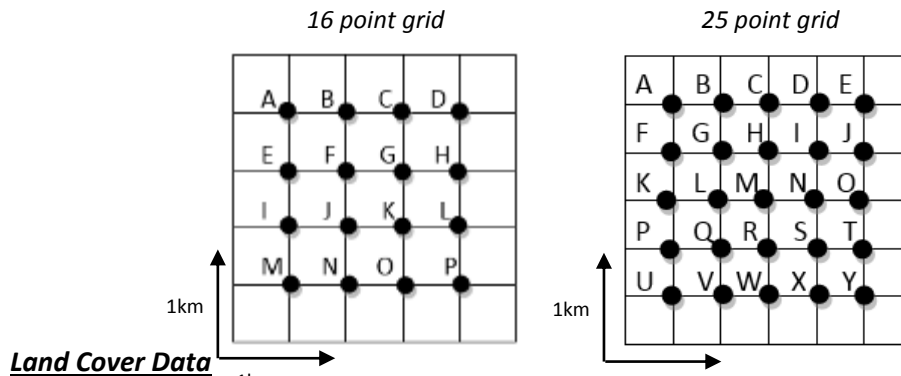

**Land Cover Data**  
Land Cover at each grid point was described using Countryside Survey 1990 Codes. A list of these codes can be found in Appendix II. The codes reflected the “mappable unit” in which the point fell. The minimum mappable unit was 400m<sup>2</sup>. Each mappable unit was determined by the constancy of the codes which described it. If one characteristic (e.g. cover of a dominant plant species) was sufficiently different from an adjacent area to be given a different code then a new mappable unit was recognised.

### **Boundary data**

The nearest vertical boundary to each grid point (within 100m) was described using Countryside Survey 1990 Codes. A list of these codes can be found in Appendix III. The point on the boundary which was nearest to the grid point was recorded as part of a length which can be coded constantly as part of a single unit of not less than 20m (the minimum mappable length). If the nearest point on the boundary was part of a longer length, then the coding reflected the variability of the longer length. Vertical boundaries included: hedgerows, walls, fences, earth/stone banks acting as field boundaries; any combination of these.

## Key Habitat Survey of England 1992-93 - Vegetation Data

---

Detailed plant species information was collected from a series of plots (as outlined in table 1). In this survey, 4 types of plot were used:

- Main (X) plots: these were either 4m<sup>2</sup> or 200m<sup>2</sup> (nested), depending on the landscape type (see table 1) and were located at five of the grid points within the square (200m<sup>2</sup>) or all grid points (4m<sup>2</sup>).
- Targeted (Y) plots: these are 4m<sup>2</sup> and 5 were placed in semi-natural vegetation types/habitats that had not been covered by the main plots.
- Stream side (S) and waterside (W) plots: these are 10 x 1m plots and up to 5 were placed immediately adjacent to watercourse where present, in Upland Landscapes only.
- Roadside (R) and Verge (V) plots: these are 10x1m plots and up to 5 were placed immediately adjacent to roads where present in Limestone and Chalk landscapes only.

Table 1: Summary of Survey Sites (refer to field handbooks)

| Habitat              | No. of 1km squares | Map Grid       | X Plots (200m <sup>2</sup> )     | X plots (2x2m)            | Y Plots (2x2m)                      | SW plots (10x1m)                 | RV plots (10x1m)               | Year surveyed |
|----------------------|--------------------|----------------|----------------------------------|---------------------------|-------------------------------------|----------------------------------|--------------------------------|---------------|
| <i>Calcareous</i>    | 43                 | 16 points, A-P | -                                | 5 plots recorded at AJGDP | 5 at locations selected by surveyor | -                                | 5 plots adjacent to roadsides. | 1993          |
| <i>Coastal</i>       | 49                 | 25 points, A-Y | 5 plots recorded at points ALITW | -                         | 5 at locations selected by surveyor | -                                | -                              | 1993          |
| <i>Lowland Heath</i> | 89                 | 25 points, A-Y | -                                | 25 plots, on grid.        | -                                   | -                                | -                              | 1992          |
| <i>Upland Heath</i>  | 32                 | 16 points, A-P | 5 plots recorded at AJGDP        | -                         | 5 at locations selected by surveyor | 5 plots adjacent to watercourses | -                              | 1993          |
| <i>Total</i>         | <i>213</i>         | <i>--</i>      | <i>241</i>                       | <i>662</i>                | <i>620</i>                          | <i>150</i>                       | <i>201</i>                     | <i>-</i>      |

Table 2: Summary of Vegetation Plots

| Habitat       | No. of 1km squares | X Plots (200m <sup>2</sup> ) | X plots (4m <sup>2</sup> ) | Y Plots (2x2m) | SW plots (10x1m) | RV plots (10x1m) |
|---------------|--------------------|------------------------------|----------------------------|----------------|------------------|------------------|
| Calcareous    | 43                 | -                            | 122                        | 215            | -                | 81(R)<br>120(V)  |
| Coastal       | 49                 | 93                           | -                          | 245            | -                | -                |
| Lowland Heath | 89                 | -                            | 540                        | -              | -                | -                |
| Upland Heath  | 32                 | 148                          | -                          | 160            | 60 (S)<br>90 (W) | -                |
| <i>Total</i>  | <i>213</i>         | <i>241</i>                   | <i>662</i>                 | <i>620</i>     | <i>150</i>       | <i>201</i>       |

Note: 35 squares have no plot data, mostly in the lowland heath habitat

## Key Habitat Survey of England 1992-93 - Datasets

---

## List of tables

| Table Name                            | Description                                                                        |
|---------------------------------------|------------------------------------------------------------------------------------|
| <i>Key_Habitat_Survey_Squares.csv</i> | List of set of 1km squares surveyed, for each habitat type                         |
| <i>Key_Habitat_Plot_Headers.csv</i>   | Vegetation plot header information and location                                    |
| <i>Key_Habitat_Plot_Species.csv</i>   | List of plant species recorded within each vegetation plot                         |
| <i>Key_Habitat_LC_Features.csv</i>    | Land cover data mapped at each grid point within squares                           |
| <i>Key_Habitat_LC_Species.csv</i>     | Species details pertaining to land cover features in Key_Habitat_LC_Features table |
| <i>Key_Habitat_BD_Features.csv</i>    | Boundary data mapped at each grid point within squares                             |
| <i>Key_Habitat_BD_Species.csv</i>     | Species details pertaining to boundary features in Key_Habitat_BD_Features table   |

## Table Relationships

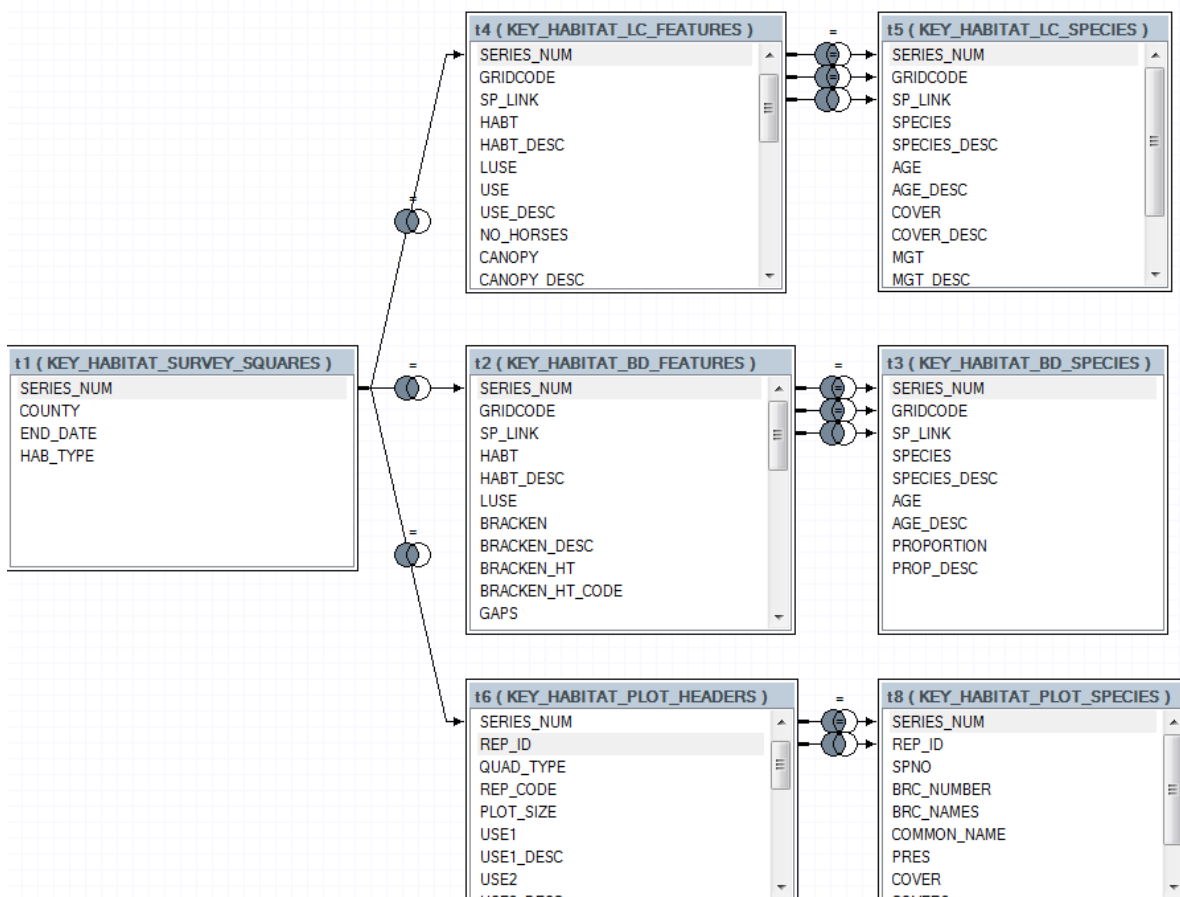

## Table Descriptions

### Key\_Habitat\_Survey\_Squares.csv

Information from front cover of Field Assessment Booklet regarding 1km survey square. Site code, county in which located, end of survey date, habitat type.

| Column name | Description                  | Type |
|-------------|------------------------------|------|
| SERIES_NUM  | Survey square number         | Text |
| COUNTY      | County square located in     | Text |
| END_DATE    | Date survey square finished  | Date |
| HAB_TYPE    | Key Habitat (landscape) type | Text |

### **Key Habitat Plot Headers.csv**

Vegetation plot header information and location (where known).

| Column name  | Description                                                                                                             | Type    |
|--------------|-------------------------------------------------------------------------------------------------------------------------|---------|
| HAB_TYPE     | Key Habitat (landscape) type                                                                                            | Text    |
| SERIES_NUM   | Survey square number                                                                                                    | Text    |
| REP_ID       | Code of plot                                                                                                            | Text    |
| QUAD_TYPE    | Type of plot: Y (targeted), X (main plot), R (roadside), V (verge), S (stream), W (waterside) <i>(see handbook)</i>     | Text    |
| REP_CODE     | Number of plot if X, Y, R or V plot types (rather than alphabetic grid codes)                                           | Text    |
| PLOT_SIZE    | Size of plot: Y= 2x2m, X= 200m <sup>2</sup> (14.1x14.1m) <b>or</b> 2x2m, R=10x1m S=10x1m <i>(see handbook)</i>          | Text    |
| USE1         | Land Use code 1 (from plot sheet)                                                                                       | Numeric |
| USE1_DESC    | Land Use code 1 description                                                                                             | Text    |
| USE2         | Land Use code 2 (from plot sheet)                                                                                       | Numeric |
| USE2_DESC    | Land Use code 2 description                                                                                             | Text    |
| USE3         | Land Use code 3 (from plot sheet)                                                                                       | Numeric |
| USE3_DESC    | Land Use code 3 description                                                                                             | Text    |
| PHYS         | Physiology code (from plot sheet)                                                                                       | Numeric |
| PHYS_DESC    | Physiology description                                                                                                  | Text    |
| SLOPE        | Slope description. (from plot sheet)<br>Flat (no slope discernable), Slight (<5° by eye), Moderate (6-15°), Steep (>15) | Text    |
| ASPECT       | Aspect in degrees from north. None if flat (from plot sheet)                                                            | Numeric |
| SHADE        | Shade description (from plot sheet).<br>Full/open/partial/none                                                          | Text    |
| GRAZING      | Grazing description (from plot sheet)                                                                                   | Text    |
| SUBSTRATE    | Substrate description (from plot sheet)                                                                                 | Text    |
| SOIL_DEPTH   | Soil depth (from plot sheet)                                                                                            | Text    |
| DESCRIPTION1 | Site description 1 – notes (from plot sheet)                                                                            | Text    |
| DESCRIPTION2 | Site description 2 – notes (from plot map sheet)                                                                        | Text    |

### **Key Habitats Plot Species.csv**

List of plant species and covers recorded within each vegetation plot. *Note: Bare ground and total bryophytes not entered in R/V or S/W plots.*

| Column name | Description                                                                                                                                                                                                           | Type    |
|-------------|-----------------------------------------------------------------------------------------------------------------------------------------------------------------------------------------------------------------------|---------|
| SERIES_NUM  | Survey square number                                                                                                                                                                                                  | Text    |
| REP_ID      | Plot code description, sometimes the same as Gridcode in squares where plots were done on the 16/25 point grid                                                                                                        | Text    |
| SPNO        | Species code number                                                                                                                                                                                                   | Numeric |
| BRC_NUMBER  | Biological record centre species code                                                                                                                                                                                 | Text    |
| BRC_NAMES   | Biological record centre species name (Stace, 2010)                                                                                                                                                                   | Text    |
| COMMON_NAME | Common name of species where available                                                                                                                                                                                | Text    |
| PRES        | Quadrat nest number in which species first appears ( <i>see handbook</i> ). If relevant COVER or COVER2 is 0 and PRES >=1, then species is present at <5% cover. For Total Bryophytes and Lichens, 0 = whole quadrat. | Numeric |
| COVER       | Cover % for inner quadrat 4m <sup>2</sup> where plots are 200m <sup>2</sup> , otherwise whole plot for un-nested plots                                                                                                | Numeric |
| COVER2      | Cover % for entire plot 200m <sup>2</sup> where plots are 200m <sup>2</sup> , otherwise N/A.                                                                                                                          | Numeric |
| HAB_TYPE    | Key Habitat (landscape) type                                                                                                                                                                                          | Text    |

### **Key Habitat LC Features.csv**

Land cover data mapped at each grid point within survey squares.

| Column Name    | Description                                                | Type    |
|----------------|------------------------------------------------------------|---------|
| HAB_TYPE       | Key Habitat (landscape) type                               | Text    |
| SERIES_NUM     | Survey square number                                       | Text    |
| GRIDCODE       | Location of plot on square grid                            | Text    |
| SP_LINK        | Additional link to <i>Key_Habitat_LC_Species.csv</i> table |         |
| HABT           | Habitat type code                                          | Numeric |
| HABT_DESC      | Habitat type description                                   | Text    |
| LUSE           | Land Use Code ( <i>see appendix V</i> )                    | Text    |
| USE            | Use code                                                   | Numeric |
| USE_DESC       | Use description                                            | Text    |
| NO_HORSES      | Number of horses                                           | Numeric |
| CANOPY         | Canopy code                                                | Numeric |
| CANOPY_DESC    | Canopy description                                         | Text    |
| DESC           | Description code                                           | Numeric |
| DESC_DESC      | Description of description code                            | Text    |
| FOF            | Forestry feature type code                                 | Numeric |
| FOF_DESC       | Forestry feature description                               | Text    |
| FORBS          | Forbs cover code                                           | Numeric |
| FORBS_DESC     | Forbs cover description                                    | Text    |
| HEATHER        | Heather type code                                          | Numeric |
| HEATHER_DESC   | Heather type description                                   | Text    |
| OTHER          | Additional other code                                      | Numeric |
| OTHER_DESC     | Additional other description                               | Text    |
| PEAT           | Peat code                                                  | Numeric |
| PEAT_DESC      | Peat cover description                                     | Text    |
| OTHER_USE      | Additional use code                                        | Numeric |
| OTHER_USE_DESC | Additional use description                                 | Text    |
| WEEDPROP       | Proportion of weeds code                                   | Numeric |

|              |                          |      |
|--------------|--------------------------|------|
| WEEDPROP_DES | Proportion of weeds code | Text |
|--------------|--------------------------|------|

### **Key\_Habitat\_LC\_Species.csv**

Species details pertaining to land cover features in Key\_Habitat\_LC\_Features table

| Column Name  | Description                                                                                                                                                                                                                                        | Type    |
|--------------|----------------------------------------------------------------------------------------------------------------------------------------------------------------------------------------------------------------------------------------------------|---------|
| SERIES_NUM   | Survey square number                                                                                                                                                                                                                               | Text    |
| GRIDCODE     | Location of plot on square grid                                                                                                                                                                                                                    | Text    |
| SPECIES      | Species code                                                                                                                                                                                                                                       | Numeric |
| SP_LINK      | Additional link to <i>Key_Habitat_LC_Features.csv</i> table                                                                                                                                                                                        | Numeric |
| SPECIES_DESC | Description of species                                                                                                                                                                                                                             | Text    |
| AGE          | Age code                                                                                                                                                                                                                                           | Numeric |
| AGE_DESC     | Description of age of species                                                                                                                                                                                                                      | Text    |
| COVER        | Percentage cover code of species                                                                                                                                                                                                                   | Numeric |
| COVER_DESC   | Description of Percentage cover of species.<br><i>Note: sometimes this refers to the cover of the overall feature - these should be cover codes (COVER) 651-655 but occasionally these have been used for species and there is some confusion.</i> | Text    |
| MGT          | Management code                                                                                                                                                                                                                                    | Numeric |
| MGT_DESC     | Description of management                                                                                                                                                                                                                          | Text    |
| HEIGHT       | Height of species                                                                                                                                                                                                                                  | Numeric |
| HEIGHT_DESC  | Description of height                                                                                                                                                                                                                              | Text    |

### **Key\_Habitat\_BD\_Features**

Boundary data mapped at each boundary nearest to grid points within survey squares.

| Column Name     | Description                                                | Type    |
|-----------------|------------------------------------------------------------|---------|
| SERIES_NUM      | Survey square number                                       | Text    |
| GRIDCODE        | Location of plot on square grid                            | Text    |
| SP_LINK         | Additional link to <i>Key_Habitat_BD_Species.csv</i> table | Numeric |
| HABT            | Habitat/feature code                                       | Numeric |
| HABT_DESC       | Habitat/feature description                                | Text    |
| LUSE            | Land Use code ( <i>see appendix V</i> )                    | Text    |
| BRACKEN         | Bracken code                                               | Numeric |
| BRACKEN_DESC    | Bracken description                                        | Text    |
| BRACKEN_HT_CODE | Bracken height code                                        | Numeric |
| BRACKEN_HT      | Bracken height description                                 | Text    |
| GAPS            | Gaps code                                                  | Numeric |
| GAPS_DESC       | Gaps description                                           | Text    |
| MGT             | Management code                                            | Numeric |
| MGT_DESC        | Management description                                     | Text    |
| STOCK           | Stock proof code                                           | Numeric |



|             |                               |         |
|-------------|-------------------------------|---------|
| STOCK_DESC  | Stock proof description       | Text    |
| USE         | Use code                      | Numeric |
| USE_DESC    | Use description               | Text    |
| DESC1       | Description 1 code            | Numeric |
| DESC1_DESC  | Description 1 description     | Text    |
| DESC2       | Description 2 code            | Numeric |
| DESC2_DESC  | Description 1 description     | Text    |
| DESC3       | Description 3 code            | Numeric |
| DESC3_DESC  | Description 3 description     | Text    |
| OTHER       | Other information             | Numeric |
| OTHER_DESC  | Other information description | Text    |
| CANOPY      | Canopy code                   | Numeric |
| CANOPY_DESC | Canopy description            | Text    |
| HEIGHT      | Feature height code           | Numeric |
| HEIGHT_DESC | Feature height description    | Text    |
| HAB_TYPE    | Key Habitat type              | Text    |

### Key\_Habitat\_BD\_Species

Species details pertaining to land cover features in Key\_Habitat\_BD\_Features table

| Column Name  | Description                                      | Type         |
|--------------|--------------------------------------------------|--------------|
| SERIES_NUM   | Survey square number                             | Text         |
| GRIDCODE     | Location of plot on square grid                  | Text         |
| SP_LINK      | Link to <i>Key_Habitat_BD_Features.csv</i> table |              |
| SPECIES      | Species code                                     | Long integer |
| SPECIES_DESC | Species description                              | Text         |
| AGE          | Age code (of trees)                              | Long Integer |
| AGE_DESC     | Age description (of trees)                       | Text         |
| PROPORTION   | Proportion of cover of species code              | Long Integer |
| PROP_DESC    | Proportion of cover of species description       | Text         |

## Appendix 1 - List of Square codes and habitats/landscape types

| Habitat    | Square code | Habitat       | Square code | Habitat       | Square code | Habitat       | Square code | Habitat | Square code |
|------------|-------------|---------------|-------------|---------------|-------------|---------------|-------------|---------|-------------|
| Calcareous | AD1         | Lowland Heath | A1          | Lowland Heath | D7          | Upland Heath  | MD1         | Coastal | ED10        |
| Calcareous | AD10        | Lowland Heath | A10         | Lowland Heath | D8          | Upland Heath  | MD10        | Coastal | ED2         |
| Calcareous | AD101       | Lowland Heath | A11         | Lowland Heath | E1          | Upland Heath  | MD2         | Coastal | ED3         |
| Calcareous | AD11        | Lowland Heath | A12         | Lowland Heath | E10         | Upland Heath  | MD3         | Coastal | ED5         |
| Calcareous | AD13        | Lowland Heath | A2          | Lowland Heath | E11         | Upland Heath  | MD4         | Coastal | ED6         |
| Calcareous | AD2         | Lowland Heath | A3          | Lowland Heath | E12         | Upland Heath  | MD5         | Coastal | ED7         |
| Calcareous | AD4         | Lowland Heath | A4          | Lowland Heath | E2          | Upland Heath  | MD7         | Coastal | ED8         |
| Calcareous | AD5         | Lowland Heath | A5          | Lowland Heath | E3          | Upland Heath  | MD8         | Coastal | ED9         |
| Calcareous | AD6         | Lowland Heath | A6          | Lowland Heath | E4          | Upland Heath  | MD9         | Coastal | EN10        |
| Calcareous | AD7         | Lowland Heath | A7          | Lowland Heath | E5          | Upland Heath  | MN1         | Coastal | EN2         |
| Calcareous | AD8         | Lowland Heath | A8          | Lowland Heath | E6          | Upland Heath  | MN2         | Coastal | EN201       |
| Calcareous | AN1         | Lowland Heath | A9          | Lowland Heath | E7          | Upland Heath  | MN3         | Coastal | EN3         |
| Calcareous | AN10        | Lowland Heath | B1          | Lowland Heath | E8          | Upland Heath  | MN4         | Coastal | EN4         |
| Calcareous | AN2         | Lowland Heath | B2          | Lowland Heath | E9          | Upland Heath  | MN5         | Coastal | EN6         |
| Calcareous | AN4         | Lowland Heath | B3          | Lowland Heath | F1          | Upland Heath  | MN6         | Coastal | EN7         |
| Calcareous | AN5         | Lowland Heath | B4          | Lowland Heath | F2          | Upland Heath  | MN9         | Coastal | EN9         |
| Calcareous | AN6         | Lowland Heath | B5          | Lowland Heath | F3          | Upland Heath  | TD10        | Coastal | HD1         |
| Calcareous | AN7         | Lowland Heath | B6          | Lowland Heath | F4          | Upland Heath  | TD101       | Coastal | HD10        |
| Calcareous | AN8         | Lowland Heath | B7          | Lowland Heath | F5          | Upland Heath  | TD11        | Coastal | HD101       |
| Calcareous | AN9         | Lowland Heath | B8          | Lowland Heath | F6          | Upland Heath  | TD12        | Coastal | HD3         |
| Calcareous | BD1         | Lowland Heath | C1          | Lowland Heath | F7          | Upland Heath  | TD13        | Coastal | HD4         |
| Calcareous | BD11        | Lowland Heath | C10         | Lowland Heath | F8          | Upland Heath  | TD14        | Coastal | HD5         |
| Calcareous | BD13        | Lowland Heath | C11         | Lowland Heath | G1          | Upland Heath  | TD15        | Coastal | HD6         |
| Calcareous | BD14        | Lowland Heath | C12         | Lowland Heath | G10         | Upland Heath  | TD2         | Coastal | HD7         |
| Calcareous | BD15        | Lowland Heath | (L)C13      | Lowland Heath | G11         | Upland Heath  | TD4         | Coastal | HD9         |
| Calcareous | BD16        | Lowland Heath | (L)C14      | Lowland Heath | G12         | Upland Heath  | TD6         | Coastal | HN1         |
| Calcareous | BD17        | Lowland Heath | (L)C15      | Lowland Heath | (L)G13      | Upland Heath  | TD7         | Coastal | HN10        |
| Calcareous | BD18        | Lowland Heath | (L)C16      | Lowland Heath | (L)G14      | Upland Heath  | TD8         | Coastal | HN2         |
| Calcareous | BD19        | Lowland Heath | (L)C17      | Lowland Heath | (L)G15      | Upland Heath  | TD9         | Coastal | HN3         |
| Calcareous | BD21        | Lowland Heath | C2          | Lowland Heath | (L)G16      | Upland Heath  | TN2         | Coastal | HN4         |
| Calcareous | BD22        | Lowland Heath | C3          | Lowland Heath | G2          | Upland Heath  | TN3         | Coastal | HN5         |
| Calcareous | BD4         | Lowland Heath | C4          | Lowland Heath | G3          | Upland Heath  | TN4         | Coastal | HN6         |
| Calcareous | BD7         | Lowland Heath | C5          | Lowland Heath | G4          |               |             | Coastal | HN9         |
| Calcareous | BD8         | Lowland Heath | C6          | Lowland Heath | G5          | Lowland Heath | H6          | Coastal | SD1         |
| Calcareous | BD9         | Lowland Heath | C7          | Lowland Heath | G6          | Lowland Heath | H7          | Coastal | SD10        |
| Calcareous | BN10        | Lowland Heath | C8          | Lowland Heath | G7          | Lowland Heath | H8          | Coastal | SD2         |
| Calcareous | BN101       | Lowland Heath | C9          | Lowland Heath | G8          |               |             | Coastal | SD4         |
| Calcareous | BN2         | Lowland Heath | D1          | Lowland Heath | G9          | Coastal       | SN2         | Coastal | SD5         |
| Calcareous | BN5         | Lowland Heath | D2          | Lowland Heath | H1          | Coastal       | SN3         | Coastal | SD7         |
| Calcareous | BN6         | Lowland Heath | D3          | Lowland Heath | H2          | Coastal       | SN5         | Coastal | SD8         |
| Calcareous | BN7         | Lowland Heath | D4          | Lowland Heath | H3          | Coastal       | SN6         | Coastal | SD9         |
| Calcareous | BN8         | Lowland Heath | D5          | Lowland Heath | H4          | Coastal       | SN7         | Coastal | SN1         |
| Calcareous | BN9         | Lowland Heath | D6          | Lowland Heath | H5          | Coastal       | SN8         | Coastal | SN10        |

## Appendix II - Land Cover Codes

| CODE | DESCRIPTION                |   | CODE | DESCRIPTION                 |   | CODE | DESCRIPTION                |   |
|------|----------------------------|---|------|-----------------------------|---|------|----------------------------|---|
| 1    | Cliff > 30m high           | P | 113  | Fen                         | P | 163  | Molinia caerulea           |   |
| 2    | Cliff 5-30m high           | P | 114  | Marsh                       | P | 164  | Eriophorum angustifolium   |   |
| 3    | Rock outcrop & cliff < 5m  | P | 115  | Flush                       | P | 165  | Eriophorum vaginatum       |   |
| 4    | Scree                      | P | 116  | Saltmarsh                   | P | 166  | Trichorophorum caespitosum |   |
| 5    | Surface boulders           | P | 117  | Wheat                       | P | 167  | Sphagnum spp.              |   |
| 6    | Limestone pavement         | P | 118  | Barley                      | P | 168  | Juncus squarrosus          |   |
| 7    | Peat hags                  | P | 119  | Oats                        | P | 169  | Juncus squarrosus          |   |
| 10   | Soil erosion               | P | 120  | Sugar beat                  | P | 170  | Erica cinerea              |   |
| 17   | 10-50% peat                |   | 121  | Turnips/swedes/roots        | P | 175  | 25-50%                     |   |
| 31   | Cliff > 30m high           | P | 122  | Kale                        | P | 176  | 50-75%                     |   |
| 32   | Cliff 5-30m high           | P | 123  | Potatoes                    | P | 177  | 75-95%                     |   |
| 34   | Rocky/boulder shore        | P | 124  | Field beans                 | P | 178  | 95-100%                    |   |
| 35   | Pebble/gravel shore        | P | 125  | Peas                        | P | 179  | < 10cm                     |   |
| 36   | Sandy shore (or dune)      | P | 126  | Maize                       | P | 180  | 10-30cm                    |   |
| 37   | Bare mud                   | P | 127  | Rye                         | P | 181  | 30-50cm                    |   |
| 38   | Sea                        | P | 128  | Oilseed rape                | P | 182  | 0.5-1m                     |   |
| 51   | Lake - natural             | P | 129  | Other crop                  | P | 183  | 1-1.5m                     |   |
| 52   | Lake - artificial          | P | 130  | Flowers                     | P | 184  | > 1.5m                     |   |
| 53   | River                      | P | 131  | Commercial horticulture     | P | 185  | Beef                       |   |
| 54   | Canalised river            | P | 132  | Orchard                     | P | 186  | Dairy                      |   |
| 55   | Canal                      | P | 133  | Unmanaged grass             | P | 187  | Breeders                   |   |
| 56   | Stream                     | P | 134  | Tall herb vegetation        | P | 188  | Dual purpose               |   |
| 58   | Other ditch                | P | 136  | Ley                         |   | 189  | Sheep                      |   |
| 61   | Signs of drainage          | P | 137  | Unimproved grass            |   | 190  | Goats                      |   |
| 64   | Levee                      | P | 138  | Forbs 10-25% (grass)        |   | 191  | Horses                     |   |
| 65   | Bank < 1m                  |   | 139  | Forbs 25-50% (grass)        |   | 192  | Pigs                       |   |
| 66   | Bank 1-5m                  |   | 140  | Forbs > 50% (grass)         |   | 193  | Silage                     |   |
| 67   | Bank > 5m                  |   | 141  | Neglected                   |   | 194  | Hay                        |   |
| 90   | Burnt heather              |   | 142  | Abandoned                   |   | 195  | Deer                       |   |
| 91   | Regenerating heather       |   | 143  | Ploughed                    | P | 196  | Grouse                     |   |
| 92   | Vigorous heather           |   | 144  | Burnt                       |   | 197  | No apparent use            |   |
| 93   | Heather mosaic             |   | 145  | Mown                        |   | 201  | Individual trees           | P |
| 94   | Heather dominant           |   | 146  | Lolium multiflorum          |   | 202  | Scattered trees            | P |
| 95   | Collapsing heather         |   | 147  | Lolium perenne              |   | 203  | Line of trees              | P |
| 96   | Mat heather                |   | 148  | Trifolium repens            |   | 204  | Belt of trees              | P |
| 97   | Bushy heather              |   | 149  | Dactylis glomerata          |   | 205  | Clump of trees             | P |
| 98   | Mop heather                |   | 150  | Anthoxanthum odoratum       |   | 206  | Woodland/forest            | P |
| 99   | Dead heather               |   | 151  | Phleum pratense             |   | 207  | Individual scrub species   | P |
| 101  | Lowland agricultural grass | P | 152  | Cynosurus cristatus         |   | 208  | Scattered scrub            | P |
| 102  | Upland grass               | P | 153  | Holcus lanatus              |   | 209  | Line of scrub              | P |
| 103  | Moorland - grass           | P | 154  | Agrostis tenuis             |   | 210  | Patch of scrub             | P |
| 104  | Moorland - shrub heath     | P | 155  | Festuca ovina               |   | 215  | Closed canopy              |   |
| 105  | Calcareous grassland       | P | 156  | Pteridium aquilinum - dense | P | 216  | Canopies not touching      |   |
| 106  | Maritime vegetation        | P | 157  | Pteridium aquilinum -       |   | 218  | Parkland                   |   |
| 107  | Lowland heath              | P | 158  | Juncus effusus              |   | 221  | Fir - Douglas              |   |
| 108  | Aquatic macrophytes        | P | 159  | Deschampsia flexuosa        |   | 222  | Larch                      |   |
| 110  | Raised bog                 | P | 160  | Nardus stricta              |   | 223  | Pine - Corsican            |   |
| 111  | Blanket bog                | P | 161  | Calluna vulgaris            |   | 224  | Pine - Lodgepole           |   |
| 112  | Valley bog                 | P | 162  | Vaccinium myrtillus         |   | 225  | Pine - Scots               |   |

CODE DESCRIPTION

CODE DESCRIPTION

CODE DESCRIPTION

|     |                        |     |                              |     |                                 |   |
|-----|------------------------|-----|------------------------------|-----|---------------------------------|---|
| 226 | Spruce - Norway        | 291 | Regrowth - cut stump         | 508 | Touring caravan park            | P |
| 227 | Spruce - Sitka         | 292 | Grazing (stock)              | 511 | Other designated area           | P |
| 228 | Unspecified conifer    | 293 | Ride/firebreak               | 521 | Horsiculture                    | P |
| 231 | Alder                  | 294 | Bracken - dense              | 522 | Angling                         | P |
| 232 | Ash                    | 295 | Bracken - scattered          | 524 | Other recreation                | P |
| 233 | Beech                  | 322 | Hedge > 50% other species    | 601 | Dry heath                       | P |
| 234 | Birch                  | 331 | Stone bank                   | 602 | Wet heath                       | P |
| 235 | Bramble                | 341 | > 2m high                    | 605 | Rock crevice veg (maritime)     |   |
| 236 | Elder                  | 358 | Uncut                        | 608 | Maritime grassland              |   |
| 237 | Elm                    | 364 | Bracken present              | 609 | Maritime heath                  |   |
| 239 | Gorse                  | 401 | Building                     | 610 | Strandline vegetation           |   |
| 240 | Hawthorn               | 402 | Garden/grounds with trees    | 613 | Stable yellow dune              |   |
| 241 | Hornbeam               | 403 | Garden/grounds without trees | 615 | Dune slacks                     |   |
| 242 | Lime                   | 404 | Public open space            | 616 | Inundation grassland (maritime) |   |
| 243 | Oak                    | 405 | Amenity grass > 1ha          | 621 | Pioneer saltmarsh               |   |
| 244 | Poplar                 | 406 | Allotments                   | 622 | Low marsh                       |   |
| 245 | Rowan                  | 407 | Car park                     | 623 | Middle/upper marsh              |   |
| 246 | Sweet chestnut         | 409 | Graden centre/nursery        | 625 | Weeds>10%                       |   |
| 247 | Sycamore               | 410 | Embankment                   | 626 | Weeds>25%                       |   |
| 248 | Willow                 | 411 | Other land                   | 627 | Weeds>50%                       |   |
| 250 | Mixed broadleaf        | 421 | Residential                  | 628 | Festuca rubra                   |   |
| 251 | Mixed conifer          | 422 | Commercial                   | 630 | Cattle                          |   |
| 252 | Unspecified broadleaf  | 423 | Industrial                   | 631 | Setaside                        |   |
| 256 | 25-50%                 | 424 | Public service & facilities  | 640 | Blackthorn                      |   |
| 257 | 50-75%                 | 425 | Institutional                | 641 | Hazel                           |   |
| 258 | 75-95%                 | 426 | Educational/cultural         | 645 | Glade                           | P |
| 259 | 95-100%                | 427 | Religious                    | 651 | 10-25% (1ry codes only)         |   |
| 261 | 1-4 years              | 428 | Agricultural                 | 652 | 26-50%                          |   |
| 262 | 5-20 years             | 429 | Sporting/recreational        | 653 | 51-75%                          |   |
| 263 | 20-100 years           | 430 | Waste - domestic             | 654 | 76-95%                          |   |
| 264 | > 100 years            | 431 | Waste - industrial           | 655 | 96-100%                         |   |
| 266 | Timber production      | 432 | Quarry/mine                  | 678 | Calcareous                      |   |
| 267 | Landscape              | 433 | Gravel pit                   | 777 | Unknown                         | P |
| 268 | Sporting/game          | 441 | New                          | 888 | New to map                      | P |
| 269 | Public recreation      | 442 | Vacant                       |     |                                 |   |
| 270 | Nature conservation    | 443 | Derelict                     |     |                                 |   |
| 271 | Shelter                | 451 | Railway track/land           |     |                                 |   |
| 275 | Well managed           | 452 | Road (tarmac)                |     |                                 |   |
| 276 | Unmanaged - thriving   | 453 | Verge < 1m                   |     |                                 |   |
| 277 | Unmanaged - improvable | 454 | Verge 1-5m                   |     |                                 |   |
| 278 | Declining              | 455 | Verge > 5m                   |     |                                 |   |
| 281 | Felling/stumps         | 456 | Constructed track            |     |                                 |   |
| 282 | Natural regeneration   | 457 | Unconstructed track          |     |                                 |   |
| 283 | Underplanting          | 458 | Footpath (exclusive)         |     |                                 |   |
| 284 | Planted                | 459 | Footpath (other)             |     |                                 |   |
| 286 | Staked trees           | 460 | Satisfactory throughout      |     |                                 |   |
| 287 | Tree protectors        | 501 | School playing fields        |     |                                 |   |
| 288 | Fenced (single trees)  | 502 | Other playing fields         |     |                                 |   |
| 289 | Windblow               | 503 | Golf course                  |     |                                 |   |
| 290 | Dead standing trees    | 507 | Static caravan(s)            |     |                                 |   |

\* P = Primary Code

**Note: Surveyors were allowed to add unique codes in each Square, therefore certain codes will not be listed here**

## Appendix III - Boundary Codes

| CODE | DESCRIPTION              |   | CODE | DESCRIPTION           | CODE | DESCRIPTION             |
|------|--------------------------|---|------|-----------------------|------|-------------------------|
| 34   | Rocky/boulder shore      | P | 237  | Elm                   | 352  | Not stockproof          |
| 38   | Sea                      | P | 238  | Field maple           | 353  | Filled gaps < 10%       |
| 52   | Lake - artificial        | P | 239  | Gorse                 | 354  | Filled gaps > 10%       |
| 53   | River                    | P | 240  | Hawthorn              | 355  | Signs of replacement    |
| 55   | Canal                    | P | 241  | Hornbeam              | 356  | Signs of removal        |
| 56   | Stream                   | P | 242  | Lime                  | 357  | Trimmed                 |
| 57   | Roadside ditch           | P | 243  | Oak                   | 358  | Uncut                   |
| 58   | Other ditch              | P | 244  | Poplar                | 359  | Derelict                |
| 62   | Waterfall                | P | 245  | Rowan                 | 360  | Line of relict hedge    |
| 63   | Gorge                    | P | 246  | Sweet chestnut        | 361  | Laying                  |
| 65   | Bank < 1m                |   | 247  | Sycamore              | 362  | Flailing                |
| 66   | Bank 1-5m                |   | 248  | Willow                | 363  | Regrowth from stumps    |
| 67   | Bank > 5m                |   | 250  | Mixed broadleaf       | 364  | Bracken present         |
| 94   | Heather dominant         |   | 251  | Mixed conifer         | 410  | Embankment              |
| 112  | Valley bog               | P | 252  | Unspecified broadleaf | 421  | Residential             |
| 113  | Fen                      | P | 256  | 25-50%                | 443  | Derelict                |
| 134  | Tall herb vegetation     | P | 257  | 50-75%                | 457  | Unconstructed track     |
| 149  | Dactylis glomerata       |   | 258  | 75-95%                | 640  | Blackthorn              |
| 151  | Phleum pratense          |   | 259  | 95-100%               | 641  | Hazel                   |
| 162  | Vaccinium myrtillus      |   | 261  | 1-4 years             | 651  | 10-25% (1ry codes only) |
| 175  | 25-50%                   |   | 262  | 5-20 years            | 652  | 26-50%                  |
| 176  | 50-75%                   |   | 263  | 20-100 years          | 653  | 51-75%                  |
| 178  | 95-100%                  |   | 264  | > 100 years           | 654  | 76-95%                  |
| 180  | 10-30cm                  |   | 267  | Landscape             | 655  | 96-100%                 |
| 181  | 30-50cm                  |   | 271  | Shelter               | 888  | New to map              |
| 182  | 0.5-1m                   |   | 282  | Natural regeneration  | 999  | No longer on map        |
| 183  | 1-1.5m                   |   | 284  | Planted               |      |                         |
| 184  | > 1.5m                   |   | 286  | Staked trees          |      |                         |
| 189  | Sheep                    |   | 287  | Tree protectors       |      |                         |
| 201  | Individual trees         | P | 290  | Dead standing trees   | P    |                         |
| 203  | Line of trees            | P | 291  | Regrowth - cut stump  |      |                         |
| 204  | Belt of trees            | P | 295  | Bracken - scattered   |      |                         |
| 205  | Clump of trees           | P | 301  | Dry-stone wall        | P    |                         |
| 207  | Individual scrub species | P | 302  | Mortared wall         | P    |                         |
| 208  | Scattered scrub          | P | 303  | Other wall            | P    |                         |
| 209  | Line of scrub            | P | 311  | Fence - wood only     | P    |                         |
| 210  | Patch of scrub           | P | 312  | Fence - iron only     | P    |                         |
| 215  | Closed canopy            |   | 313  | Fence - wire on posts | P    |                         |
| 216  | Canopies not touching    |   | 314  | Other fence           | P    |                         |
| 217  | Hedgerow                 |   | 321  | Hedge > 50% hawthorn  | P    |                         |
| 222  | Larch                    |   | 322  | Hedge > 50% other     | P    |                         |
| 225  | Pine - Scots             |   | 323  | Mixed hedge           | P    |                         |
| 228  | Unspecified conifer      |   | 331  | Stone bank            | P    |                         |
| 231  | Alder                    |   | 332  | Earth bank            | P    |                         |
| 232  | Ash                      |   | 333  | Grass strip only      | P    |                         |
| 233  | Beech                    |   | 341  | > 2m high             |      |                         |
| 234  | Birch                    |   | 342  | 1-2m high             |      |                         |
| 235  | Bramble                  |   | 343  | < 1m high             |      |                         |
| 236  | Elder                    |   | 351  | Stockproof            |      |                         |

\* P = Primary Code

*Note: Surveyors were allowed to add unique codes in each Square, therefore certain codes will not be listed here*

## Appendix IV: LUSE Codes

|     |                                           |
|-----|-------------------------------------------|
| WLF | <b>Woody linear feature (hedge)</b>       |
| AN  | <b>Agriculture/Natural Vegetation</b>     |
| CF  | <b>Coastal Feature</b>                    |
| FO  | <b>Forestry</b>                           |
| FOU | <b>Forestry Use</b>                       |
| IL  | <b>Inland Physiography</b>                |
| IW  | <b>Inland Water</b>                       |
| RE  | <b>Recreation</b>                         |
| ST  | <b>Structures</b>                         |
| TR  | <b>Transport</b>                          |
| AC  | <b>Agricultural Crops</b>                 |
| FOF | <b>Forestry Feature</b>                   |
| GS  | <b>Grass Strip</b>                        |
| B   | <b>Bank</b>                               |
| F   | <b>Fence</b>                              |
| W   | <b>Wall</b>                               |
| US  | <b>Un-surveyed/Missing Data</b>           |
| AGU | <b>Agriculture/Natural Vegetation Use</b> |
